# Supplementary material for: Phenomenology of high-ozone episodes in NE Spain
Source: Copernicus journal article supplement (doi:10.5194/acp-17-2817-2017), 2017-02-23
Supplement: Supplementary file 1 [file Supplement.pdf › Supplement.pdf]

## *SUPPLEMENTARY INFORMATION (CAPTIONS)*

Figure S1. Correlation between: Top: O<sub>3</sub> measured with the passive dosimeters and an UV photometry analyser. Middle: NO<sub>2</sub> measured with the passive dosimeters and a chemiluminescence analyser. Bottom: O<sub>3</sub> measured with the PO3M sensor and an UV photometry analyser.

Figure S2. Instrumentation pack for tethered balloon measurements.

Figure S3. Comparison between the nano-particle sizer (two units) used in the tethered balloon with the reference scanning mobility particle sizer.

Figure S4. Instrumentation pack for free sounding measurements.

Figure S5. 8-h PM<sub>2.5</sub> chemical components at VIC station during 10-17/07/2015. White: 16:00-24:00 UTC. Blue: 00:00-08:00 UTC. Yellow: 08:00-16:00 UTC.

Figure S6. Spatial variability of the monthly July O<sub>3</sub> and O<sub>x</sub> concentrations recorded in the study area at the XVPCA air quality monitoring network and with the passive dosimeters.

Table S1. Name, acronym, type, coordinates and measurements for each of the stations of the regional air quality network (XVPCA).

Table S2. Details of vertical measurements performed with the balloon and the miniaturised instrumentation at VIC.

Table S3. Location of the meteorological stations.

Table S1.

| STATION                         | TYPE                 | COORDINATES |              | HEIGHT     | ONLINE MEASUREMENTS                                                                                  | OFFLINE MEASUREMENTS                                                                                 |
|---------------------------------|----------------------|-------------|--------------|------------|------------------------------------------------------------------------------------------------------|------------------------------------------------------------------------------------------------------|
|                                 |                      | Lat<br>(°N) | Long<br>(°E) | (m.a.s.l.) |                                                                                                      |                                                                                                      |
| Agullana (AGU)                  | Rural, Background    | 42.39       | 2.84         | 166        | O <sub>3</sub>                                                                                       |                                                                                                      |
| Alcover (ALC)                   | Rural, Industry      | 41.28       | 1.18         | 243        | O <sub>3</sub> , NO, NO <sub>2</sub> , CO, SO <sub>2</sub> , H <sub>2</sub> S                        |                                                                                                      |
| Amposta (AMP)                   | Suburban, Background | 40.71       | 0.58         | 8          | O <sub>3</sub> , NO, NO <sub>2</sub> , CO, SO <sub>2</sub> , PM <sub>10</sub>                        | C <sub>6</sub> H <sub>6</sub>                                                                        |
| Badalona (BAD)                  | Urban, Traffic       | 41.44       | 2.23         | 6          | O <sub>3</sub> , NO, NO <sub>2</sub> , SO <sub>2</sub>                                               |                                                                                                      |
| Barcelona Gràcia<br>(BCN-G)     | Urban, Traffic       | 41.40       | 2.15         | 75         | O <sub>3</sub> , NO, NO <sub>2</sub> , SO <sub>2</sub> , C <sub>6</sub> H <sub>6</sub>               | PM <sub>10</sub> , PM <sub>2.5</sub> , As, B(a)p, Cd,<br>Ni, Pb, C <sub>6</sub> H <sub>6</sub>       |
| Barcelona Poblenou<br>(BCN-PBN) | Urban, Traffic       | 41.40       | 2.20         | 12         | O <sub>3</sub> , NO, NO <sub>2</sub> , SO <sub>2</sub>                                               | PM <sub>10</sub> , PM <sub>2.5</sub> , As, B(a)p, Cd,<br>Ni, Pb, C <sub>6</sub> H <sub>6</sub>       |
| Barcelona Palau<br>Reial (PLR)  | Urban, Background    | 41.39       | 2.11         | 81         | O <sub>3</sub> , NO, NO <sub>2</sub> , CO, SO <sub>2</sub>                                           |                                                                                                      |
| Barcelona Ciutadella (CTL)      | Urban, Background    | 41.39       | 2.19         | 5          | O <sub>3</sub> , NO, NO <sub>2</sub>                                                                 |                                                                                                      |
| Begur (BEG)                     | Rural, Background    | 41.95       | 3.02         | 200        | O <sub>3</sub>                                                                                       | C <sub>6</sub> H <sub>6</sub>                                                                        |
| Bellver de Cerdanya<br>(BdC)    | Rural, Background    | 42.37       | 1.78         | 1060       | O <sub>3</sub> , NO, NO <sub>2</sub> , PM <sub>10</sub>                                              | PM <sub>10</sub> , PM <sub>2.5</sub> , As, B(a)p, Cd,<br>Ni, Pb, C <sub>6</sub> H <sub>6</sub>       |
| Berga (VER)                     | Suburban, background | 42.10       | 1.85         | 661        | O <sub>3</sub> , NO, NO <sub>2</sub> , CO, SO <sub>2</sub> , PM <sub>10</sub>                        | PM <sub>10</sub> , PM <sub>2.5</sub> , As, B(a)p, Cd,<br>Ni, Pb, C <sub>6</sub> H <sub>6</sub>       |
| Constantí (CON)                 | Suburban, Industry   | 41.16       | 1.22         | 87         | O <sub>3</sub> , NO, NO <sub>2</sub> , CO, SO <sub>2</sub>                                           | PM <sub>10</sub> , PM <sub>2.5</sub> , As, B(a)p, Cd,<br>Ni, Pb, C <sub>6</sub> H <sub>6</sub> , HCl |
| El Prat de Llobregat<br>(EPLL)  | Suburban, Traffic    | 41.32       | 2.08         | 7          | O <sub>3</sub> , NO, NO <sub>2</sub> , SO <sub>2</sub> , H <sub>2</sub> S                            | PM <sub>10</sub> , PM <sub>2.5</sub> , Pb, C <sub>6</sub> H <sub>6</sub>                             |
| Els Guiamets                    | Rural, Background    | 41.10       | 0.76         | 220        | O <sub>3</sub>                                                                                       |                                                                                                      |
| Gandesa (GAN)                   | Rural, Background    | 41.06       | 0.44         | 368        | O <sub>3</sub>                                                                                       |                                                                                                      |
| Gavà (GAV)                      | Suburban, Background | 41.30       | 1.99         | 25         | O <sub>3</sub> , NO, NO <sub>2</sub> , CO, SO <sub>2</sub>                                           | PM <sub>10</sub> , PM <sub>2.5</sub> , Pb                                                            |
| Granollers (GRA)                | Urban, Traffic       | 41.60       | 2.29         | 140        | O <sub>3</sub> , NO, NO <sub>2</sub>                                                                 | PM <sub>10</sub> , PM <sub>2.5</sub> , B(a)p                                                         |
| Igualada (IGU)                  | Suburban, Industry   | 41.58       | 1.63         | 284        | O <sub>3</sub> , NO, NO <sub>2</sub> , CO, SO <sub>2</sub> , H <sub>2</sub> S                        | PM <sub>10</sub> , As, B(a)p, Cd, Ni, Pb                                                             |
| Juneda (JUN)                    | Rural, Background    | 41.55       | 0.83         | 255        | O <sub>3</sub> , NO, NO <sub>2</sub>                                                                 | PM <sub>10</sub>                                                                                     |
| L'Hospitalet                    | Urban, Traffic       | 41.37       | 2.11         | 20         | NO, NO <sub>2</sub> , PM <sub>10</sub>                                                               | PM <sub>10</sub> , PM <sub>2.5</sub>                                                                 |
| La Sènia (LSE)                  | Rural, Background    | 40.64       | 0.29         | 428        | O <sub>3</sub>                                                                                       | PM <sub>10</sub> , PM <sub>2.5</sub>                                                                 |
| Lleida (LLE)                    | Urban, Traffic       | 41.62       | 0.62         | 220        | O <sub>3</sub> , NO, NO <sub>2</sub> , CO, SO <sub>2</sub> , PM <sub>10</sub>                        | PM <sub>10</sub> , PM <sub>2.5</sub> , As, B(a)p, Cd,<br>Ni, Pb, C <sub>6</sub> H <sub>6</sub>       |
| Manlleu (MAN)                   | Suburban, Background | 42.01       | 2.29         | 460        | O <sub>3</sub> , NO, NO <sub>2</sub> , SO <sub>2</sub>                                               | PM <sub>10</sub> , As, B(a)p, Cd, Ni, Pb                                                             |
| Manresa (MNR)                   | Urban, Traffic       | 41.73       | 1.83         | 238        | O <sub>3</sub> , NO, NO <sub>2</sub> , CO, SO <sub>2</sub>                                           | PM <sub>10</sub> , C <sub>6</sub> H <sub>6</sub>                                                     |
| Mataró (MAT)                    | Urban, Background    | 41.54       | 2.44         | 40         | O <sub>3</sub> , NO, NO <sub>2</sub> , CO, SO <sub>2</sub>                                           | PM <sub>10</sub> , C <sub>6</sub> H <sub>6</sub>                                                     |
| Montcada (MON)                  | Suburban, Industry   | 41.48       | 2.19         | 33         | O <sub>3</sub> , NO, NO <sub>2</sub> , SO <sub>2</sub> , PM <sub>10</sub>                            |                                                                                                      |
| Montsec (MSC)                   | Rural, Background    | 42.05       | 0.73         | 1570       | O <sub>3</sub> , NO, NO <sub>2</sub> , CO, SO <sub>2</sub> , PM <sub>10</sub> ,<br>PM <sub>2.5</sub> |                                                                                                      |
| Montseny (MSY)                  | Rural, Background    | 41.78       | 2.38         | 720        | O <sub>3</sub> , NO, NO <sub>2</sub> , CO, SO <sub>2</sub>                                           |                                                                                                      |
| Pardines (PAR)                  | Rural, Background    | 42.31       | 2.21         | 1226       | O <sub>3</sub>                                                                                       |                                                                                                      |
| Ponts (PON)                     | Rural, Background    | 41.91       | 1.19         | 370        | O <sub>3</sub>                                                                                       | PM <sub>10</sub> , C <sub>6</sub> H <sub>6</sub>                                                     |
| Reus (REU)                      | Suburban, Traffic    | 41.15       | 1.12         | 110        | O <sub>3</sub> , NO, NO <sub>2</sub> , CO, SO <sub>2</sub> , H <sub>2</sub> S,<br>PM <sub>10</sub>   | PM <sub>10</sub> , As, Cd, Ni, Pb, C <sub>6</sub> H <sub>6</sub>                                     |
| Rubí (RUB)                      | Suburban, Background | 41.49       | 2.03         | 200        | O <sub>3</sub> , NO, NO <sub>2</sub> , CO, SO <sub>2</sub> , PM <sub>10</sub>                        | PM <sub>10</sub> , PM <sub>2.5</sub> , C <sub>6</sub> H <sub>6</sub>                                 |
| Sabadell (SAB)                  | Urban, Traffic       | 41.56       | 2.10         | 190        | O <sub>3</sub> , NO, NO <sub>2</sub>                                                                 | PM <sub>10</sub> , PM <sub>2.5</sub> , C <sub>6</sub> H <sub>6</sub>                                 |
| Sant Celoni (SCE)               | Suburban, Industry   | 41.69       | 2.50         | 155        | O <sub>3</sub> , NO, NO <sub>2</sub> , CO, SO <sub>2</sub> , H <sub>2</sub> S,<br>PM <sub>10</sub>   | PM <sub>10</sub> , B(a)p, C <sub>6</sub> H <sub>6</sub>                                              |
| Sort (SOR)                      | Rural, Background    | 42.41       | 1.13         | 692        | O <sub>3</sub>                                                                                       | PM <sub>10</sub>                                                                                     |
| St Adrià Besòs<br>(SAD)         | Suburban, Traffic    | 41.42       | 2.22         | 9          | O <sub>3</sub> , NO, NO <sub>2</sub> , PM <sub>10</sub>                                              | PM <sub>10</sub> , PM <sub>2.5</sub>                                                                 |
| St Cugat del Vallès<br>(SCV)    | Urban, Background    | 41.48       | 2.09         | 124        | O <sub>3</sub> , NO, NO <sub>2</sub>                                                                 | PM <sub>10</sub>                                                                                     |
| St Vicenç dels Horts<br>(SVH)   | Suburban, Industry   | 41.39       | 2.01         | 22         | O <sub>3</sub> , NO, NO <sub>2</sub> , SO <sub>2</sub>                                               |                                                                                                      |
| S.M. Palautordera<br>(SMPT)     | Rural, Background    | 41.70       | 2.45         | 208        | O <sub>3</sub>                                                                                       | PM <sub>2.5</sub>                                                                                    |
| Sta Pau (STP)                   | Rural, Background    | 41.96       | 3.21         | 496        | O <sub>3</sub>                                                                                       |                                                                                                      |
| Tarragona (TARR)                | Urban, Background    | 41.12       | 1.24         | 14         | O <sub>3</sub> , NO, NO <sub>2</sub> , CO, SO <sub>2</sub> , H <sub>2</sub> S                        | C <sub>6</sub> H <sub>6</sub>                                                                        |

|                            |                      |       |      |     |                                                                                                                     |                                                                      |
|----------------------------|----------------------|-------|------|-----|---------------------------------------------------------------------------------------------------------------------|----------------------------------------------------------------------|
| Terrassa (TERR)            | Urban, Traffic       | 41.56 | 2.01 | 277 | O <sub>3</sub> , NO, NO <sub>2</sub> , CO, SO <sub>2</sub>                                                          | PM <sub>10</sub>                                                     |
| Tona (TON)                 | Rural, Background    | 41.86 | 2.23 | 620 | O <sub>3</sub> , NO, NO <sub>2</sub>                                                                                | C <sub>6</sub> H <sub>6</sub>                                        |
| Vic (VIC)                  | Suburban, Background | 41.92 | 2.26 | 498 | O <sub>3</sub>                                                                                                      | PM <sub>2.5</sub> , C <sub>6</sub> H <sub>6</sub>                    |
| Viladecans (VLC)           | Suburban, Traffic    | 41.31 | 2.01 | 14  | O <sub>3</sub> , NO, NO <sub>2</sub> , CO, SO <sub>2</sub>                                                          | PM <sub>10</sub> , PM <sub>2.5</sub> , C <sub>6</sub> H <sub>6</sub> |
| Vilafranca Penedès (VLP)   | Suburban, Background | 41.35 | 1.69 | 200 | O <sub>3</sub> , NO, NO <sub>2</sub> , PM <sub>10</sub>                                                             | C <sub>6</sub> H <sub>6</sub>                                        |
| Vilanova i la Geltrú (VLG) | Urban, Traffic       | 41.22 | 1.72 | 22  | O <sub>3</sub> , NO, NO <sub>2</sub> , PM <sub>10</sub>                                                             | C <sub>6</sub> H <sub>6</sub>                                        |
| Vila-Seca (VSE)            | Suburban, Industry   | 41.11 | 1.15 | 60  | O <sub>3</sub> , NO, NO <sub>2</sub> , CO, SO <sub>2</sub> , H <sub>2</sub> S, PM <sub>10</sub> , PM <sub>2.5</sub> | PM <sub>10</sub> , As, Cd, Ni, Pb, C <sub>6</sub> H <sub>6</sub>     |

Table S2.

| Date       | Start (UTC) | End (UTC) | Direction       | Height (m a.s.l.) | Instrumentation     |
|------------|-------------|-----------|-----------------|-------------------|---------------------|
| 14/07/2015 | 07:06       | 08:21     | ascending       | 520-1452          | CPC-O <sub>3</sub>  |
|            | 13:49       | 15:03     | ascending       | 520-871           | SMPS-O <sub>3</sub> |
| 15/07/2015 | 07:07       | 07:36     | ascending       | 520-1262          | SMPS-O <sub>3</sub> |
|            | 07:36       | 08:22     | descending      | 1262-520          | SMPS-O <sub>3</sub> |
|            | 08:37       | 09:04     | ascending       | 520-1069          | SMPS-O <sub>3</sub> |
| 16/07/2015 | 06:28       | 06:35     | ascending       | 520-736           | SMPS-O <sub>3</sub> |
|            | 06:35       | 07:23     | constant height | 709-736           | SMPS-O <sub>3</sub> |
|            | 07:23       | 07:26     | ascending       | 714-859           | SMPS-O <sub>3</sub> |
|            | 07:26       | 09:40     | constant height | 860-870           | SMPS-O <sub>3</sub> |
|            | 09:40       | 10:10     | ascending       | 870-1350          | SMPS-O <sub>3</sub> |
| 17/07/2015 | 07:39       | 07:52     | ascending       | 545-1002          | CPC-O <sub>3</sub>  |
|            | 07:52       | 08:29     | constant height | 999-1009          | CPC-O <sub>3</sub>  |
|            | 08:29       | 08:40     | descending      | 999-607           | CPC-O <sub>3</sub>  |
|            | 08:40       | 09:25     | constant height | 599-610           | CPC-O <sub>3</sub>  |
|            | 09:42       | 10:51     | ascending       | 517-1548          | CPC-O <sub>3</sub>  |

Table S3.

| Meteo station                  | Latitude (°N) | Longitude | Height (m a.s.l.) |
|--------------------------------|---------------|-----------|-------------------|
| Gurb                           | 41.95         | 2.23      | 509               |
| Muntanyola                     | 41.88         | 2.18      | 816               |
| Parets del Vallès              | 41.57         | 2.23      | 123               |
| Núria                          | 42.40         | 2.16      | 1971              |
| Sant Cugat del Vallès          | 41.48         | 2.08      | 158               |
| Barcelona - el Raval           | 41.38         | 2.17      | 33                |
| Barcelona - Zona Universitària | 41.38         | 2.11      | 79                |
| Castell d'Aro                  | 41.81         | 3.03      | 14                |
| Oliola                         | 41.88         | 1.15      | 443               |
| Montseny                       | 41.78         | 2.36      | 720               |
| Montsec                        | 42.05         | 0.73      | 1570              |
| Ponts                          | 41.91         | 1.19      | 363               |

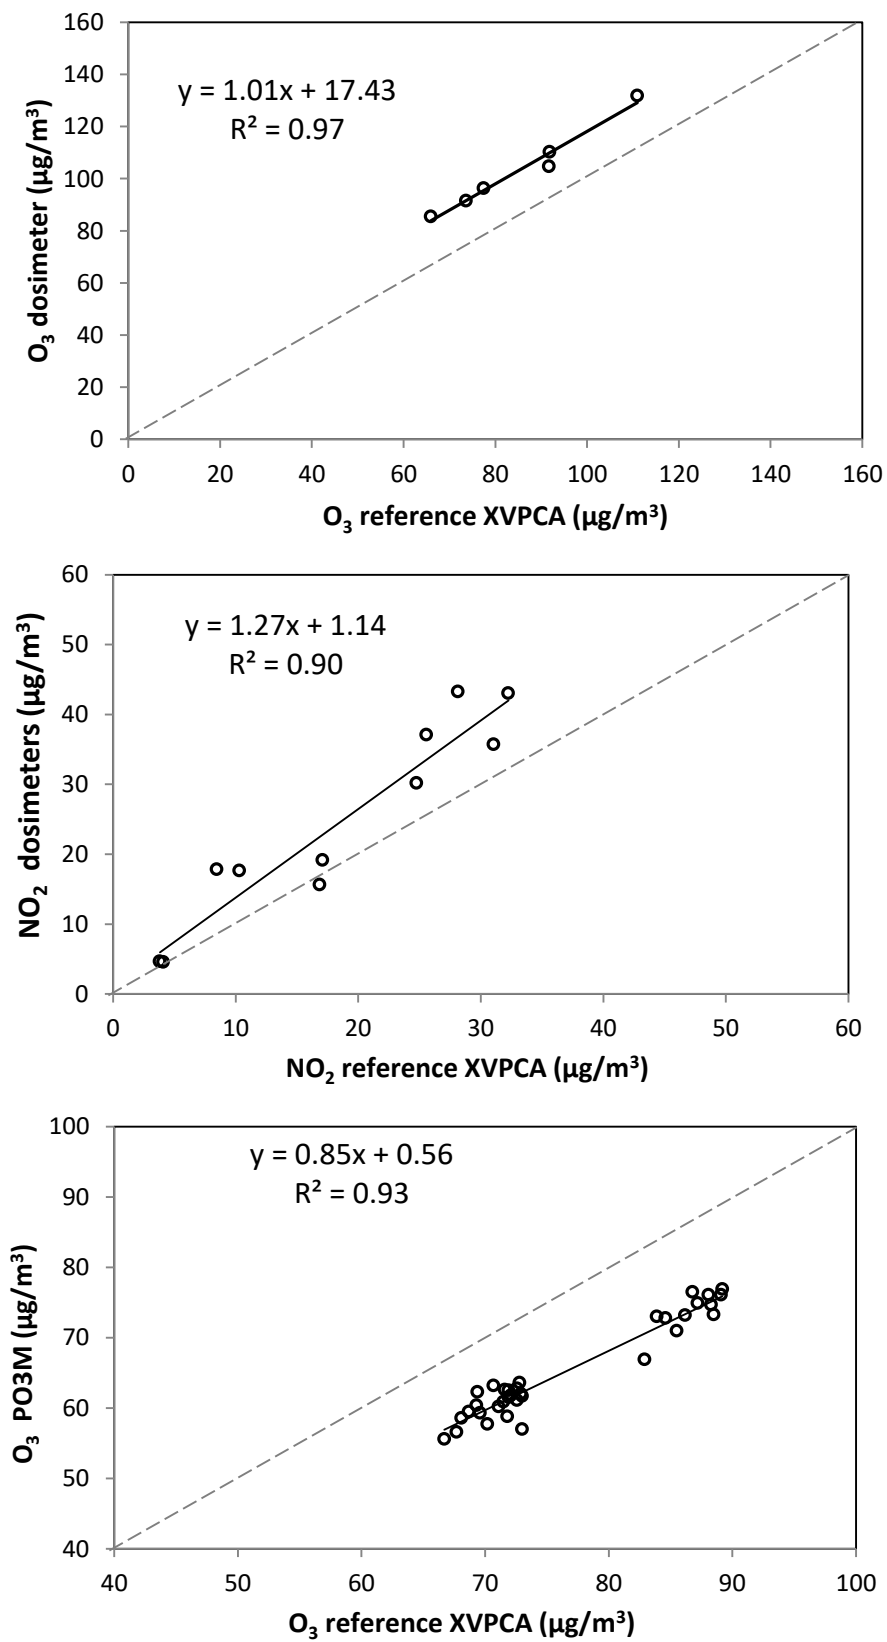

Figure S1.

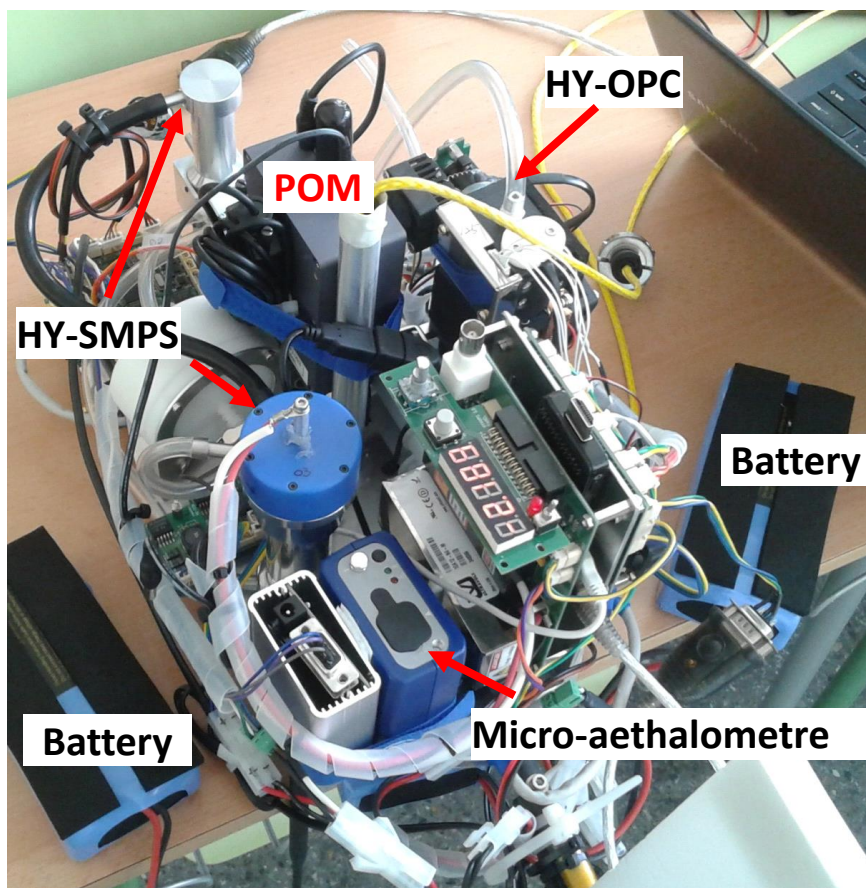

Figure S2.

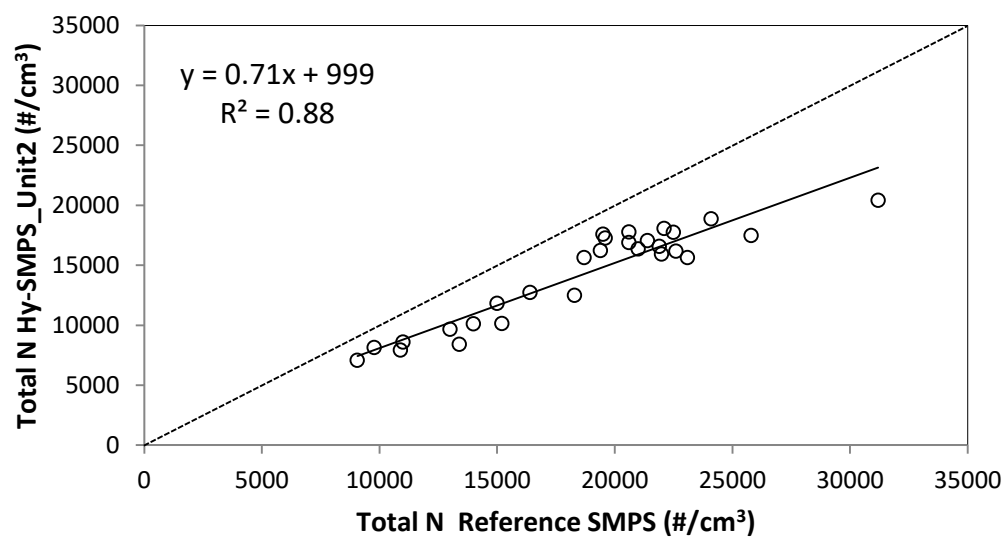

Figure S3.

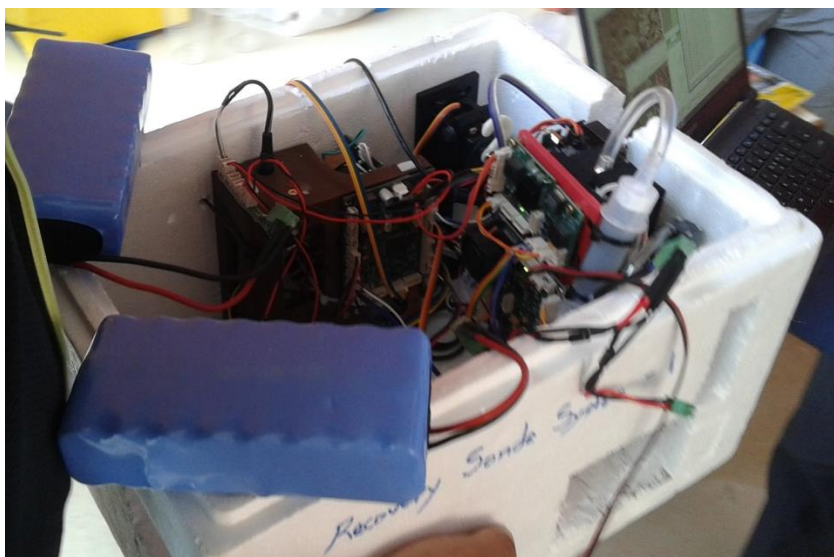

Figure S4.

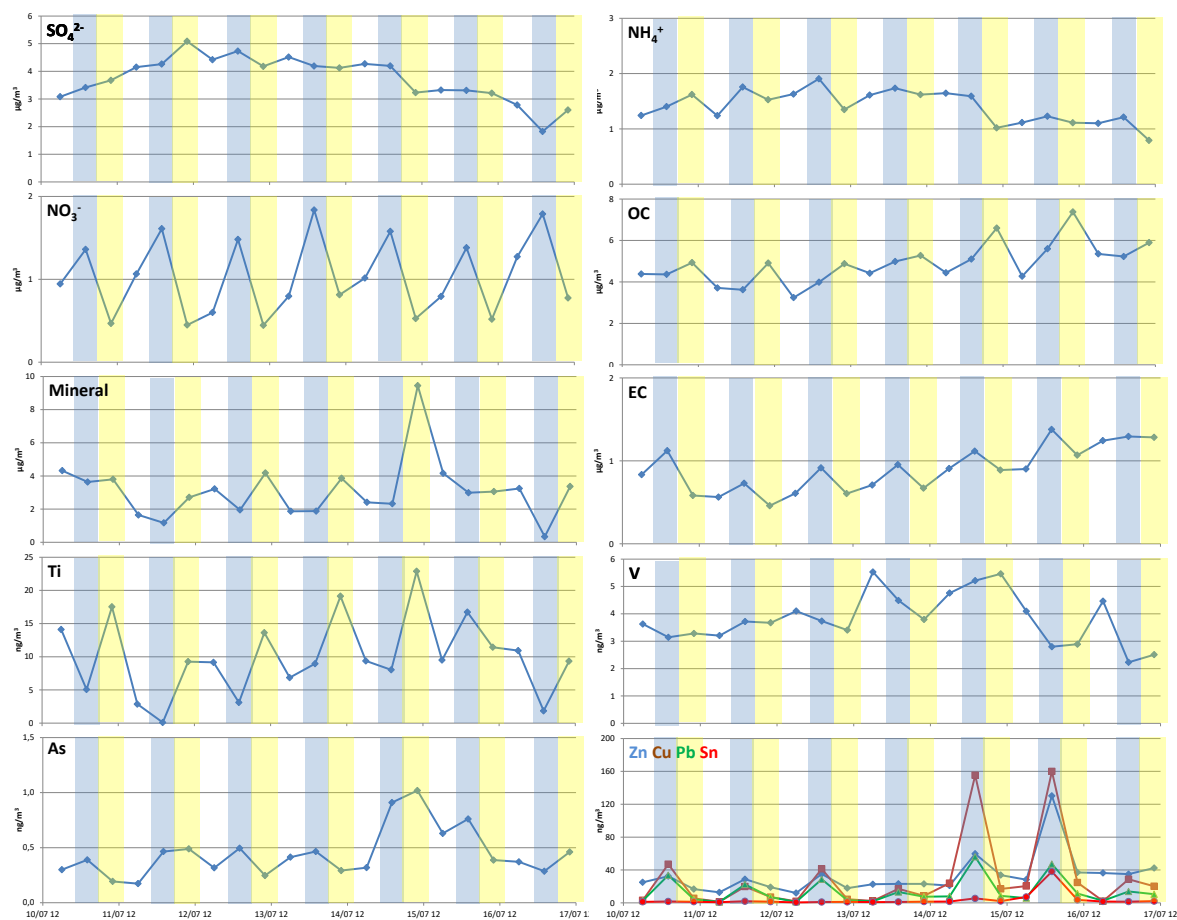

Figure S5

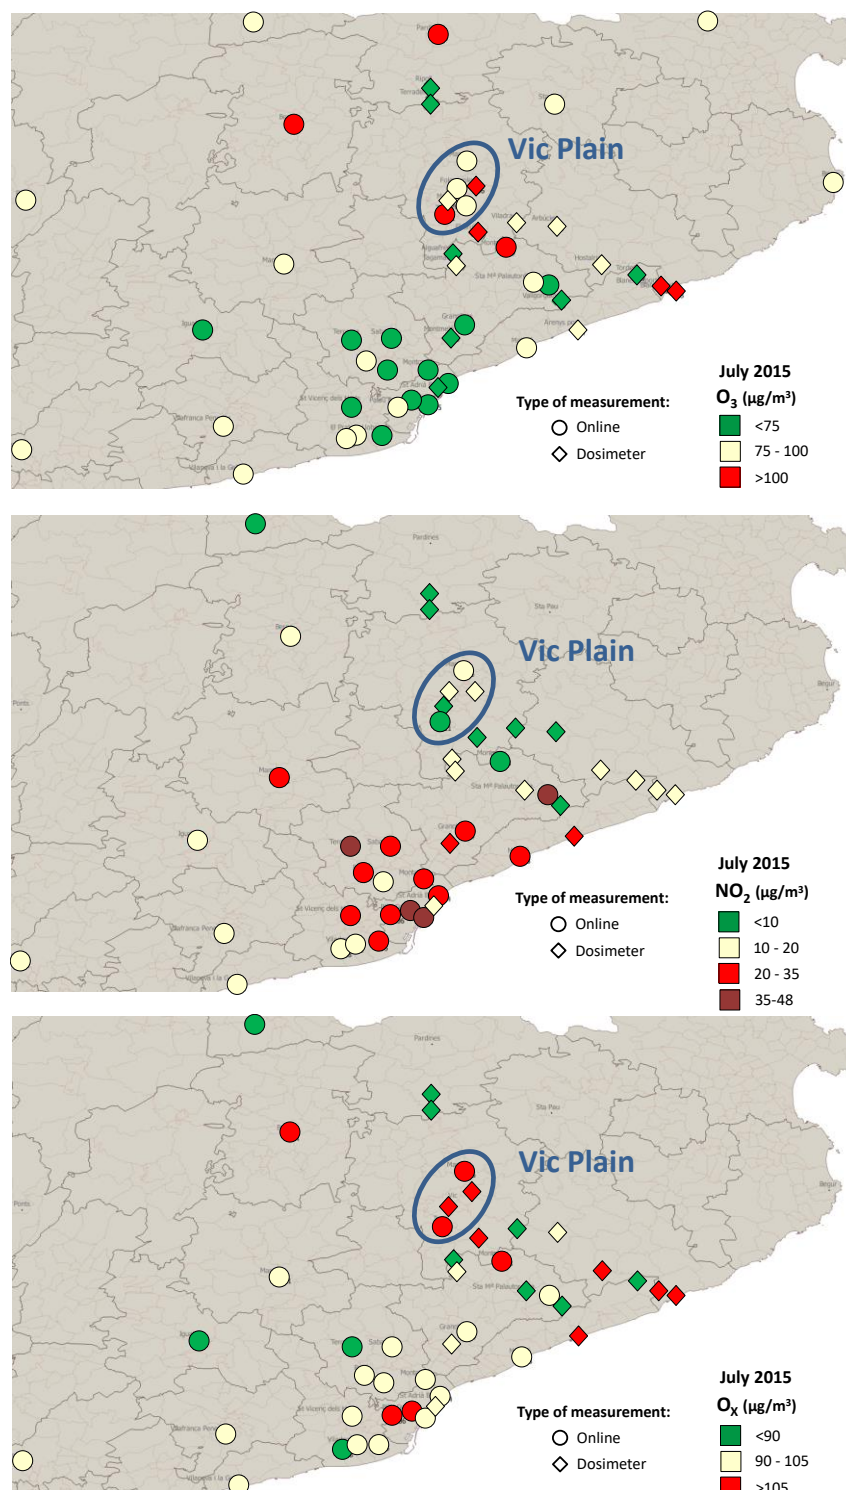

Figure S5.
