# Supplementary material for: Phenomenology of high-ozone episodes in NE Spain
Source: Copernicus journal article supplement (doi:10.5194/acp-17-2817-2017), 2017-02-23
Supplement: Supplementary file 1 [file Supplementary dosimetres.xlsx]

## Sheet: NO2
		DOSIMETRES	DOSIMETRES	Colocated Chemiluminiscence	Corrected data
	Location	NO2 µg/m3	NO2 µg/m3	NO2 µg/m3	NO2 µg/m3
		BLANK SUBSTRACTED	BLANK SUBSTRACTED
1-14/07/2015	BADALONA	20.7997	20.7997		15.8116
1-14/07/2016	ARENYS MAR	32.1669	32.1669		23.9073
1-14/07/2017	BLANES PORT	22.2245	22.2245		16.8263
1-14/07/2018	BLANES ESPORTIV	19.791	19.7644		15.0742
1-14/07/2019	BLANES ESPORTIV 2	19.7379
1-14/07/2020	TORDERA	19.9162	19.9162		15.1823
1-14/07/2021	HOSTALRIC	17.7561	17.7561		13.6439
1-14/07/2022	ARBUCIES	8.21056	8.21056		6.84556
1-14/07/2023	VILADRAV	4.26185	4.48359		4.19122
1-14/07/2024	VILADRAV 2	4.70533
1-14/07/2025	FOLGUEROLES	15.8687	15.8687		12.2997
1-14/07/2026	EL BRULL	4.65378	4.65378		4.31242
1-14/07/2027	KM18	4.66332	4.66332	3.80128	4.31922
1-14/07/2028	S. MA. PALAUTORDERA	15.1802	15.655		12.1475
1-14/07/2029	S. MA. PALAUTORDERA 2	16.1299
1-14/07/2030	VALLGORGVINA	9.41185	9.41185		7.70112
14-29/07/2015	BADALONA	17.9322	17.9322		13.7693
14-29/07/2016	ARENYS MAR	27.7002	27.7002		20.7261
14-29/07/2017	BLANES PORT	21.6252	21.6252		16.3995
14-29/07/2018	BLANES ESPORTIV	19.2976	19.3819		14.8018
14-29/07/2019	BLANES ESPORTIV 2	19.4662
14-29/07/2020	TORDERA	18.2211	18.2211		13.9751
14-29/07/2021	HOSTALRIC	15.8613	15.8613		12.2944
14-29/07/2022	ARBUCIES	8.63025	8.63025		7.14446
14-29/07/2023	VILADRAV	4.97193	4.9432		4.51855
14-29/07/2024	VILADRAV 2	4.91448
14-29/07/2025	FOLGUEROLES	18.1945	18.1945		13.9561
14-29/07/2026	EL BRULL	4.53381	4.53381		4.22698
14-29/07/2027	KM18	4.55317	4.55317	4.07955	4.24076
14-29/07/2028	S. MA. PALAUTORDERA	14.3276	14.591		11.3897
14-29/07/2029	S. MA. PALAUTORDERA 2	14.8544
14-29/07/2030	VALLGORGVINA	8.66788	8.66788		7.17126
14-29/07/2031	PR SET 1	36.2266	35.7101	31.0641	26.4307
14-29/07/2032	PR SET 1 (2)	35.1936
14-29/07/2033	Bac de Roda	49.422	49.422		36.1964
14-29/07/2034	MONTCADA	41.5069	43.0158	32.2606	31.6338
14-29/07/2035	MONTCADA	44.5246
14-29/07/2036	MONTMELO	44.3524	44.3524		32.5858
14-29/07/2037	TAGAMANENT	20.7548	20.7548		15.7796
14-29/07/2038	AIGVA FREDA	18.666	18.666		14.2919
14-29/07/2039	TONA	17.9989	17.8148	8.45367	13.6857
14-29/07/2040	TONA	17.6306
14-29/07/2041	MALLA	12.6211	12.6211		9.98678
14-29/07/2042	VIC ESTADI	19.6295	19.6964		15.0258
14-29/07/2043	VIC ESTADI	19.7634
14-29/07/2044	MANLLEU	15.6554	15.6554	16.8662	12.1478
14-29/07/2045	TERRADELLES	8.54475	8.3789		6.96545
14-29/07/2046	TERRADELLES	8.21305
14-29/07/2047	PR-2	28.7945	30.1972	24.7716	22.5044
14-29/07/2048	PR-2 (2)	31.5998
14-29/07/2049	Bac de Roda	33.5912	33.5912		24.9217
14-29/07/2050	MONTCADA	37.7352	37.1	25.5614	27.4206
14-29/07/2051	MONTCADA	36.4648
14-29/07/2052	GRANOLLERS	43.2769	43.2769	28.1433	31.8198
14-29/07/2053	TAGAMANENT	20.0733	20.4373		15.5534
14-29/07/2054	TAGAMANENT	20.8012
14-29/07/2055	AIGVAFREDA	20.2648	20.2648		15.4306
14-29/07/2056	TONA	17.8921	17.6594	10.2925	13.575
14-29/07/2057	TONA	17.4267
14-29/07/2058	MALLA	13.261	13.261		10.4425
14-29/07/2059	ESTADI VIC	21.756	23.1266		17.4688
14-29/07/2060	ESTADI VIC	24.4972
14-29/07/2061	MANLLEU	19.1349	19.1349	17.0992	14.6259
14-29/07/2062	RIPOLL	10.7058	10.7058		8.62266
14-29/07/2063	TERRADELLES	10.9868	11.0911		8.89707
14-29/07/2064	TERRADELLES	11.1954

## Sheet: O3
		DOSIMETRES	DOSIMETRES corrected with reference ultraviolet
		O3 µg/m3	O3 µg/m3
1-14/07/2015	BADALONA	110.337	92.2582
1-14/07/2016	ARENYS MAR	105.684	87.6375
1-14/07/2017	BLANES PORT	117.388	99.2599
1-14/07/2018	BLANES ESPORTIV	135.044	116.794
1-14/07/2019	TORDERA	98.6532	80.6557
1-14/07/2020	ARBUCIES	115.565	97.4502
1-14/07/2021	VILADRAV	101.668	83.6493
1-14/07/2022	Folgueroles	140.309	122.022
1-14/07/2023	El Brull	130.046	111.83
1-14/07/2024	Km18 BV-5301	131.768	110.946
1-14/07/2025	Sta. Ma. Palautordera	117.974	99.8425
1-14/07/2026	Vallgorguina	90.1345	73.0407
1-14/07/2027	Bac de Roda	113.382	95.2824
1-14/07/2028	Montcada	91.4907	73.6266
1-14/07/2029	Montmeló	81.0343	63.1592
1-14/07/2031	Tagamanent	92.2318	74.2788
1-14/07/2032	Aiguafreda	85.8884	67.9795
1-14/07/2033	Malla	102.409	84.3856
1-14/07/2034	Terradelles	62.009	44.2662
1-14/07/2035	Ripoll
14-29/07/2021	BADALONA	83.8324	65.9378
14-29/07/2022	ARENYS MAR	118.868	100.73
14-29/07/2023	BLANES PORT	135.83	117.574
14-29/07/2024	BLANES ESPORTIV	104.154	86.1181
14-29/07/2025	TORDERA	75.5761	57.739
14-29/07/2026	ARBUCIES	95.6449	77.6682
14-29/07/2027	VILADRAV	94.6465	76.6768
14-29/07/2028	Folgueroles	108.004	89.9413
14-29/07/2029	El Brull	119.546	101.403
14-29/07/2030	Km18 BV-5301	104.736	91.7143
14-29/07/2031	Sta. Ma. Palautordera	113.817	95.7144
14-29/07/2032	Vallgorguina	60.3703	42.6388
14-29/07/2033	Bac de Roda
14-29/07/2034	Montcada	85.4726	65.9944
14-29/07/2035	Montmeló
14-29/07/2037	Tagamanent	96.9759	78.99
14-29/07/2038	Aiguafreda	69.3425	51.5486
14-29/07/2039	Malla	85.9434	68.0341
14-29/07/2040	Terradelles	72.7375	54.9201
14-29/07/2041	Ripoll	69.199	51.4061
