# Supplementary material for: Phenomenology of high-ozone episodes in NE Spain
Source: Copernicus journal article supplement (doi:10.5194/acp-17-2817-2017), 2017-02-23
Supplement: Supplementary file [file acp-17-2817-2017-supplement-title-page.pdf › acp-17-2817-2017-supplement-title-page.pdf]

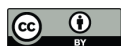

## *Supplement of*

# **Phenomenology of high-ozone episodes in NE Spain**

**Xavier Querol et al.**

*Correspondence to:* Xavier Querol ([xavier.querol@idaea.csic.es](mailto:xavier.querol@idaea.csic.es)) and Kang-Ho Ahn ([khahn@hanyang.ac.kr](mailto:khahn@hanyang.ac.kr))

- [acp-17-2817-2017-supplement-title-page.pdf](#)
- [Supplement.pdf](#)
- [Supplementary dosimetres.xlsx](#)

The copyright of individual parts of the supplement might differ from the CC-BY 3.0 licence.
